# Supplementary material for: A simple low-cost method to enhance luminescence and fluorescence signals in PDMS-based microfluidic devices
Source: Royal Society of Chemistry journal article supplement (doi:10.1039/c4ra12676a), 2015-01-01
Supplement: c4ra12676a1.pdf [file c4ra12676a1.pdf]

## SUPPORTING INFORMATION

### **A SIMPLE LOW-COST METHOD TO ENHANCE LUMINESCENCE AND FLUORESCENCE SIGNALS IN PDMS-BASED MICROFLUIDIC DEVICES**

*Klaus Eyer, Katharina Root, Tom Robinson, and Petra S. Dittrich*

*Department of Chemistry and Applied Biosciences, ETH Zurich,*

*CH-8093 Zurich (Switzerland)*

*Corresponding author:*

*Petra S. Dittrich*

*Current address:*

*ETH Zurich, Department of Biosystems Science and Engineering*

*Vladimir-Prelog-Weg 3*

*CH-8093 Zurich/Switzerland*

*e-mail: [petra.dittrich@bsse.ethz.ch](mailto:petra.dittrich@bsse.ethz.ch)*

*Phone: +41 44 633 68 93*

*FAX: +41 44 632 12 92*

a)

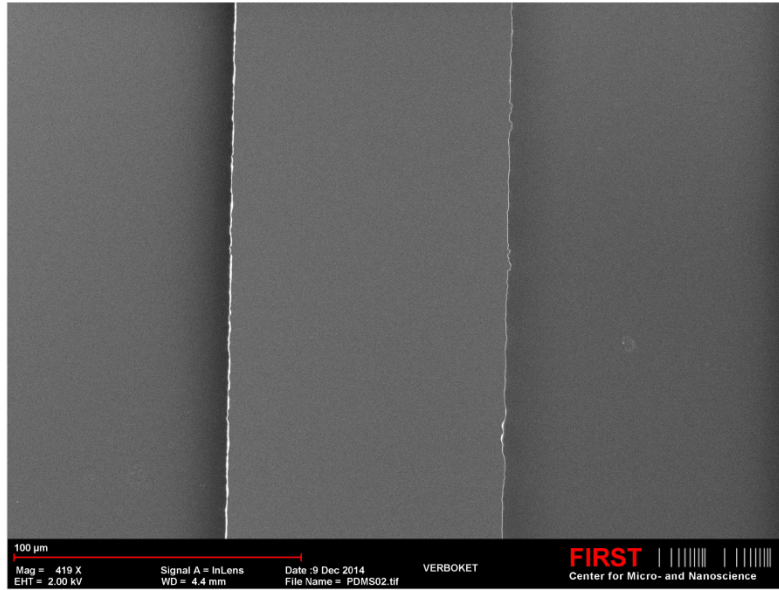

b)

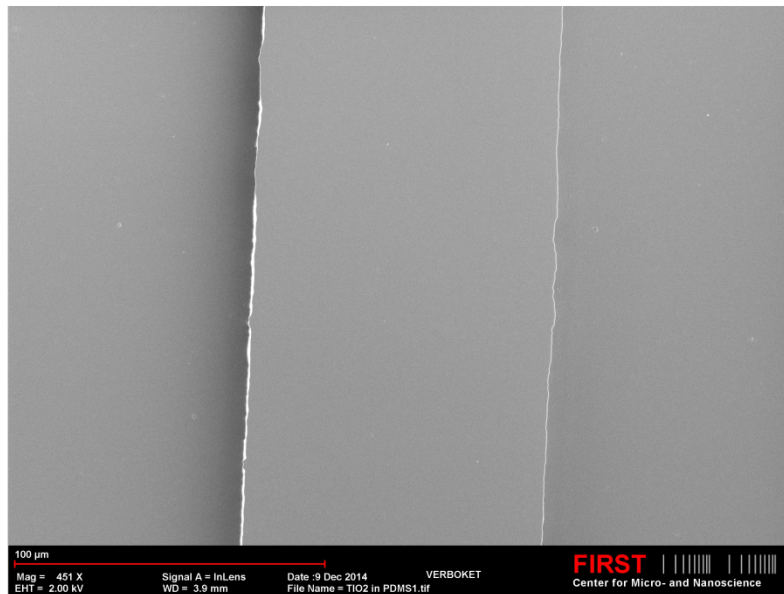

*SI Figure 1: SEM images of microfluidic channels composed of pure PDMS (a) or PDMS-TiO<sub>2</sub> composite (b). There is no visible difference in the surface roughness. The channel walls have a roughness that is mainly given by the quality of the master (i.e. the roughness of the photoresist). From these findings, we believe that the particles are fully embedded in the PDMS. Even near the surface they are always fully covered by PDMS so there is no influence on the surface properties (see also SI Figure 2 and 3).*

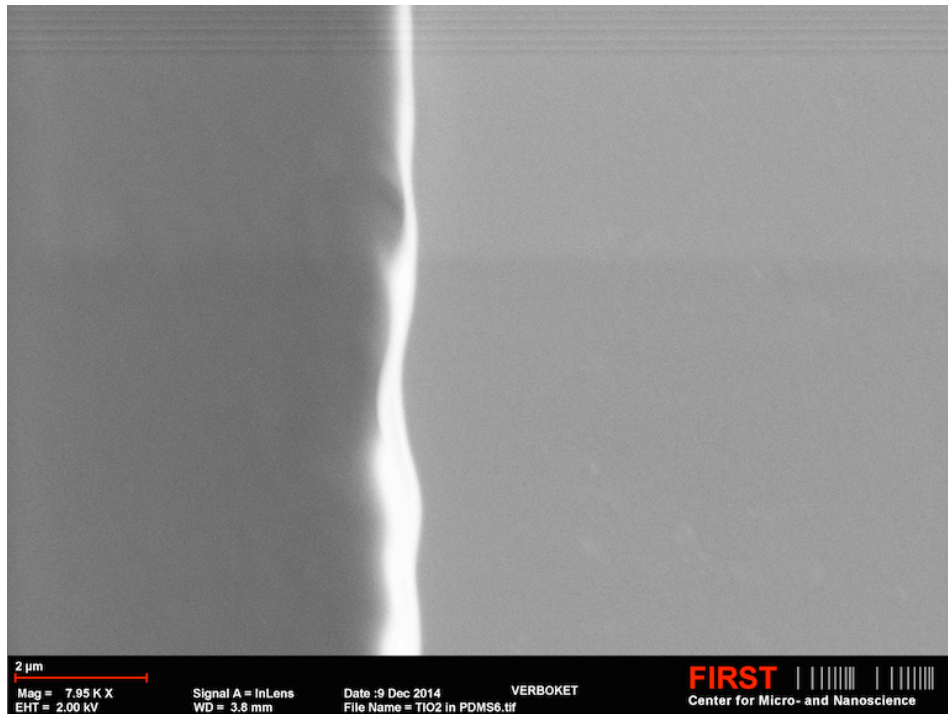

*SI Figure 2: Zoomed in SEM image of the channel edge of a PDMS-TiO<sub>2</sub> composite chip. No irregularities in the surface can be seen, i.e. no particles are protruding out of the side walls into the channel.*

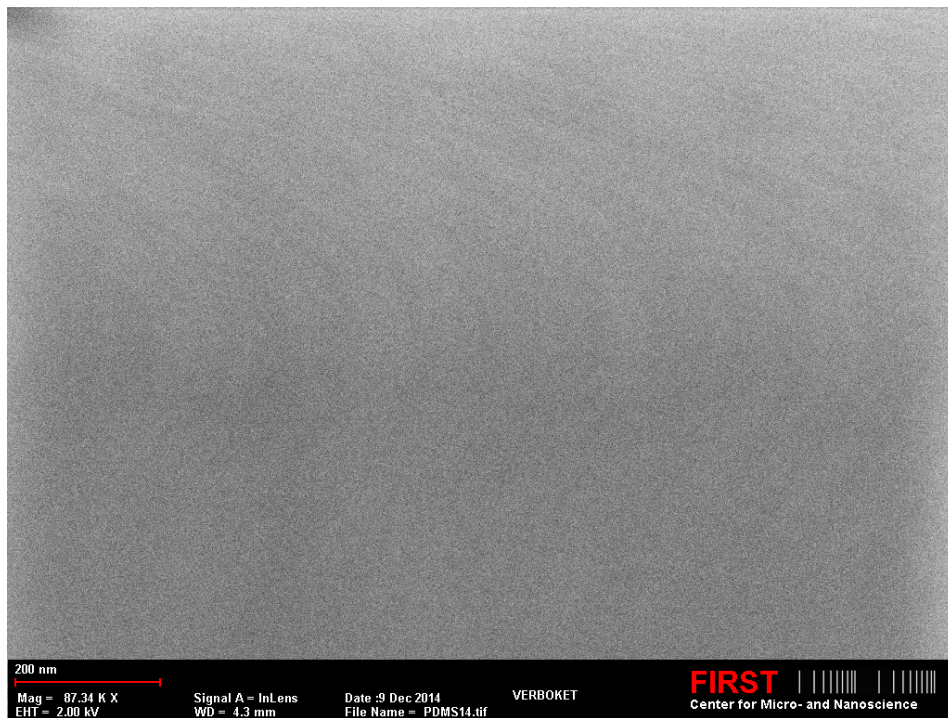

*SI Figure 3: SEM picture of the surface of the channel ceiling at high resolution.*

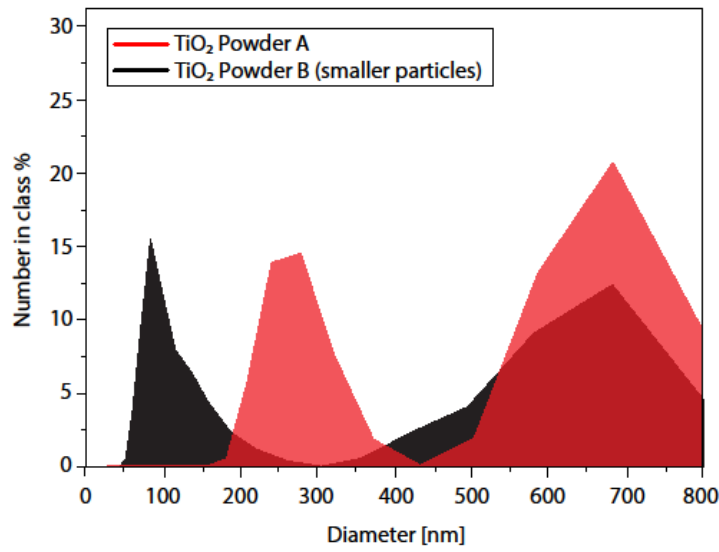

*SI Figure 4: Particle size determined by dynamic light scattering measurements. Powder B has a smaller particle size than Powder A. In both preparations aggregates with larger diameters are present. We assume that this fact is due to non-efficient and/or stabilized suspension of the particles using our protocol.*
